# Supplementary material for: SARS-CoV-2 vaccine effectiveness in preventing confirmed infection in pregnant women
Source: JCI journal article supplement (doi:10.1172/jci153662), 2021-10-07
Supplement: sd1 [file 1]

Supplementary table 1. Clinical details of the pregnant women with severe or critical COVID-19 disease.

|   | <b>Condition</b> | <b>Trimester</b> | <b>Comorbidities</b>                   | <b>Hospitalized</b> | <b>Supplemental oxygen</b> | <b>Intensive care unit admission</b> | <b>Mechanical ventilation</b> | <b>Death</b> |
|---|------------------|------------------|----------------------------------------|---------------------|----------------------------|--------------------------------------|-------------------------------|--------------|
| 1 | Severe           | First            | Type 2 diabetes                        | Yes                 | Yes                        | No                                   | No                            | No           |
| 2 | Severe           | First            | None                                   | Yes                 | Yes                        | No                                   | No                            | No           |
| 3 | Severe           | First            | Hypothyroidism                         | Yes                 | Yes                        | No                                   | No                            | No           |
| 4 | Severe           | Second           | Anemia, gestational diabetes           | Yes                 | Yes                        | No                                   | No                            | No           |
| 5 | Severe           | First            | Essential hypertension                 | Yes                 | Yes                        | Yes                                  | No                            | No           |
| 6 | Severe           | First            | Hypothyroidism                         | Yes                 | Yes                        | No                                   | No                            | No           |
| 7 | Severe           | Second           | None                                   | Yes                 | Yes                        | No                                   | No                            | No           |
| 8 | Severe           | First            | None                                   | Yes                 | No                         | No                                   | No                            | No           |
| 9 | Critical         | Second           | Bronchial asthma, gestational diabetes | Yes                 | Yes                        | Yes                                  | No                            | No           |
